# Supplementary material for: Building Cross-sectoral Collaborations to Address Perinatal Health Inequities: Insights From the Dutch Healthy Pregnancy 4 All-3 Program
Source: PubMed Central journal article supplement (PMC11365078; doi:10.34172/ijhpm.8115), 2024-07-09
Supplement: ijhpm-13-8115-s003.pdf [file ijhpm-13-8115-s003.pdf]

**Article title:** Building Cross-sectoral Collaborations to Address Perinatal Health Inequities: Insights From the Dutch Healthy Pregnancy 4 All-3 Program

**Journal name:** International Journal of Health Policy and Management (IJHPM)

**Authors' information:** Leonie A. Daalderop<sup>1,2¶</sup>, Lisa S. Barsties<sup>1,2\*¶</sup>, Frank van Steenbergen<sup>2</sup>, Adja J.M. Waelput<sup>1</sup>, Jacqueline Legendijk<sup>1</sup>, Jasper V. Been<sup>1,3,4</sup>, Eric A.P. Steegers<sup>1</sup>, Derk Loorbach<sup>2</sup>

<sup>1</sup>Department of Obstetrics and Gynaecology, Erasmus MC, University Medical Centre Rotterdam, Rotterdam, The Netherlands.

<sup>2</sup>Dutch Research Institute for Transitions, Erasmus University Rotterdam, Rotterdam, The Netherlands.

<sup>3</sup>Division of Neonatology, Department of Paediatrics, Erasmus MC – Sophia Children's Hospital, University Medical Centre Rotterdam, Rotterdam, The Netherlands.

<sup>4</sup>Department of Public Health, Erasmus MC, University Medical Centre Rotterdam, Rotterdam, The Netherlands.

**\*Correspondence to:** Lisa S. Barsties; Email: [lisa.barsties@rivm.nl](mailto:lisa.barsties@rivm.nl)

**Citation:** Daalderop LA, Barsties LS, van Steenbergen F, et al. Building cross-sectoral collaborations to address perinatal health inequities: Insights from the Dutch Healthy Pregnancy 4 All-3 program. Int J Health Policy Manag. 2024;13:8115. doi:[10.34172/ijhpm.8115](https://doi.org/10.34172/ijhpm.8115)

**Supplementary file 3.** Overview of All Sub-themes Extracted Within the Facilitator “Having A Solid Network.”

| <i>Facilitator</i>                | <i>Category</i> | <i>Description</i>                                                                                                                                                                                                                                                                                                                                                                                                    |
|-----------------------------------|-----------------|-----------------------------------------------------------------------------------------------------------------------------------------------------------------------------------------------------------------------------------------------------------------------------------------------------------------------------------------------------------------------------------------------------------------------|
| Knowing and/or finding each other | Practical       | Knowing potential collaboration partners and being able to find them enables cross-sectoral collaboration. ‘Knowing’ many professionals means literally having seen (the face of) other professionals. An overview of professionals working in different sectors, including their contact details, is a good starting point. Respondents also indicated that trusting professionals from other sectors is easier when |

|                                       |            |                                                                                                                                                                                                                                                                            |
|---------------------------------------|------------|----------------------------------------------------------------------------------------------------------------------------------------------------------------------------------------------------------------------------------------------------------------------------|
|                                       |            | they know them. Finally, only if you know professionals from other sectors, it is possible to “use” their skills and expertise.                                                                                                                                            |
| Meeting other professionals           | Practical  | (Physically) getting together helps to create new ideas, knowing each other’s skills and expertise, and identifying common goals.                                                                                                                                          |
| Being familiar with each other’s work | Practical  | Knowing what and how other professionals are working (on) helps to make agreements across sectors. Only if you are familiar with each other’s work, you can approach the right professional when in need of help.                                                          |
| Joining forces                        | Practical  | To collaborate across sectors, professionals need to be motivated to join forces. Also, all professionals need to feel responsible for the problem at stake.                                                                                                               |
| Involving each other                  | Practical  | Informing colleagues from other sectors about what you are working on, as well as involving them in your activities is important for building cross-sectoral collaborations. When working together on a project, it can be helpful to do so from the beginning onwards.    |
| Connector                             | Structural | A professional/organization that knows professionals/organizations from across different sectors, as well as their skills, expertise, needs, and structures is able to connect sectors. A connector can also motivate others to collaborate. This can be any professional. |
| Division of tasks                     | Structural | Knowing one’s tasks and responsibilities enables smooth collaboration across sectors.                                                                                                                                                                                      |

|                        |            |                                                                                                                                                                                        |
|------------------------|------------|----------------------------------------------------------------------------------------------------------------------------------------------------------------------------------------|
| Meeting structure      | Structural | Meeting professionals from different sectors on a regular basis helps to create and keep an overview of activities and changes across sectors.                                         |
| Reinforcing each other | Cultural   | Knowing one's and each other's abilities and responsibilities as well as not wanting to compete is crucial in working across sectors.                                                  |
| Joint dossier          | Structural | It is helpful to work with a joint dossier in order to know which services other professionals have offered a client already. This can prevent repeated actions and thereby save time. |
| Infrastructure         | Structural | An infrastructure in which collaboration across sectors is an integral, pre-defined, and outlined part helps to find and work with professionals from other sectors.                   |
