# Supplementary material for: Building Cross-sectoral Collaborations to Address Perinatal Health Inequities: Insights From the Dutch Healthy Pregnancy 4 All-3 Program
Source: PubMed Central journal article supplement (PMC11365078; doi:10.34172/ijhpm.8115), 2024-07-09
Supplement: ijhpm-13-8115-s004.pdf [file ijhpm-13-8115-s004.pdf]

**Article title:** Building Cross-sectoral Collaborations to Address Perinatal Health Inequities: Insights From the Dutch Healthy Pregnancy 4 All-3 Program

**Journal name:** International Journal of Health Policy and Management (IJHPM)

**Authors' information:** Leonie A. Daalderop<sup>1,2\*</sup>¶, Lisa S. Barsties<sup>1,2\*</sup>¶, Frank van Steenbergen<sup>2</sup>, Adja J.M. Waelput<sup>1</sup>, Jacqueline Legendijk<sup>1</sup>, Jasper V. Been<sup>1,3,4</sup>, Eric A.P. Steegers<sup>1</sup>, Derk Loorbach<sup>2</sup>

<sup>1</sup>Department of Obstetrics and Gynaecology, Erasmus MC, University Medical Centre Rotterdam, Rotterdam, The Netherlands.

<sup>2</sup>Dutch Research Institute for Transitions, Erasmus University Rotterdam, Rotterdam, The Netherlands.

<sup>3</sup>Division of Neonatology, Department of Paediatrics, Erasmus MC – Sophia Children's Hospital, University Medical Centre Rotterdam, Rotterdam, The Netherlands.

<sup>4</sup>Department of Public Health, Erasmus MC, University Medical Centre Rotterdam, Rotterdam, The Netherlands.

**\*Correspondence to:** Lisa S. Barsties; Email: [lisa.barsties@rivm.nl](mailto:lisa.barsties@rivm.nl)

**Citation:** Daalderop LA, Barsties LS, van Steenbergen F, et al. Building cross-sectoral collaborations to address perinatal health inequities: Insights from the Dutch Healthy Pregnancy 4 All-3 program. Int J Health Policy Manag. 2024;13:8115. doi:[10.34172/ijhpm.8115](https://doi.org/10.34172/ijhpm.8115)

**Supplementary file 4.** Overview of Additional Facilitators

| <i>Facilitator</i> | <i>Category</i> | <i>Description</i>                                                                                                                                                                                                               |
|--------------------|-----------------|----------------------------------------------------------------------------------------------------------------------------------------------------------------------------------------------------------------------------------|
| Trust              | Cultural        | Many professionals described that trust in each other's working methods, having an open attitude towards each other, and being able to talk openly about all kinds of subjects, positively affect cross-sectoral collaborations. |
| Common language    | Cultural        | Understanding what professionals from other sectors are talking about can be challenging. Creating a common language or learning how to understand each other's language is an                                                   |

|              |            |                                                                                                                                                                                                                                                                                                        |
|--------------|------------|--------------------------------------------------------------------------------------------------------------------------------------------------------------------------------------------------------------------------------------------------------------------------------------------------------|
|              |            | important prerequisite for cross-sectoral collaborations.                                                                                                                                                                                                                                              |
| Support base | Structural | When collaborating across sectors, it is important that there is a strong support base in every sector, preferably at every organizational level (politics, management, and execution). To create such a support base, it is essential that all involved professionals have the same sense of urgency. |
| Money        | Structural | Shared finances can help to organize care more efficiently. Additionally, financial support can enable the funding of necessary collaboration structures, platforms, and communication.                                                                                                                |
