# Supplementary material for: Building Cross-sectoral Collaborations to Address Perinatal Health Inequities: Insights From the Dutch Healthy Pregnancy 4 All-3 Program
Source: PubMed Central journal article supplement (PMC11365078; doi:10.34172/ijhpm.8115), 2024-07-09
Supplement: ijhpm-13-8115-s005.pdf [file ijhpm-13-8115-s005.pdf]

**Article title:** Building Cross-sectoral Collaborations to Address Perinatal Health Inequities: Insights From the Dutch Healthy Pregnancy 4 All-3 Program

**Journal name:** International Journal of Health Policy and Management (IJHPM)

**Authors' information:** Leonie A. Daalderop<sup>1,2¶</sup>, Lisa S. Barsties<sup>1,2\*¶</sup>, Frank van Steenbergen<sup>2</sup>, Adja J.M. Waelput<sup>1</sup>, Jacqueline Legendijk<sup>1</sup>, Jasper V. Been<sup>1,3,4</sup>, Eric A.P. Steegers<sup>1</sup>, Derk Loorbach<sup>2</sup>

<sup>1</sup>Department of Obstetrics and Gynaecology, Erasmus MC, University Medical Centre Rotterdam, Rotterdam, The Netherlands.

<sup>2</sup>Dutch Research Institute for Transitions, Erasmus University Rotterdam, Rotterdam, The Netherlands.

<sup>3</sup>Division of Neonatology, Department of Paediatrics, Erasmus MC – Sophia Children's Hospital, University Medical Centre Rotterdam, Rotterdam, The Netherlands.

<sup>4</sup>Department of Public Health, Erasmus MC, University Medical Centre Rotterdam, Rotterdam, The Netherlands.

**\*Correspondence to:** Lisa S. Barsties; Email: [lisa.barsties@rivm.nl](mailto:lisa.barsties@rivm.nl)

**Citation:** Daalderop LA, Barsties LS, van Steenbergen F, et al. Building cross-sectoral collaborations to address perinatal health inequities: Insights from the Dutch Healthy Pregnancy 4 All-3 program. *Int J Health Policy Manag.* 2024;13:8115. doi:[10.34172/ijhpm.8115](https://doi.org/10.34172/ijhpm.8115)

**Supplementary file 5.** Overview of Additional Barriers

| <i>Barrier</i>           | <i>Category</i> | <i>Description</i>                                                                                                                                                                               |
|--------------------------|-----------------|--------------------------------------------------------------------------------------------------------------------------------------------------------------------------------------------------|
| Unclear responsibilities | Practical       | Many professionals described unclear responsibilities as well as the lack of shared responsibilities to address perinatal health inequities as major barriers for cross-sectoral collaborations. |
| Privacy regulations      | Structural      | Professionals experienced the General data Protection Regulation (GDPR) as a barrier for cross-sectoral collaborations as they do not know which information can be shared. This                 |

|                                              |            |                                                                                                                                                                                                                                                                                                                                 |
|----------------------------------------------|------------|---------------------------------------------------------------------------------------------------------------------------------------------------------------------------------------------------------------------------------------------------------------------------------------------------------------------------------|
|                                              |            | gives them a feeling of insecurity and fear when they would like to share information.                                                                                                                                                                                                                                          |
| Lack of a common goal/plan                   | Structural | Many professionals described that the lack of a common goal/plan between sectors is a barrier for efficient and effective cross-sectoral collaborations.                                                                                                                                                                        |
| Too many involved professional/organizations | Structural | Professionals mentioned that the magnitude of organizations involved in the topic of perinatal health (e.g., hospitals, welfare organizations, maternity care organizations, and neighbourhood teams) hinders efficient and effective crosssectoral collaborations.                                                             |
| Insufficient and discontinuous capacity      | Practical  | Respondents complained about frequent personnel changes. These are at the expense of continuity and hinder collaboration. Another problem is that teams often are composed of only a few professionals. If someone leaves the team, there is an immediate understaffing, which has a direct impact on collaboration structures. |
